# Supplementary material
Source: PubMed Central journal article supplement (PMC4798425)
Supplement: NIHMS767047-supplement-supplement_1.pdf [file NIHMS767047-supplement-supplement_1.pdf]

Patient #1:

Supplementary Figure S1

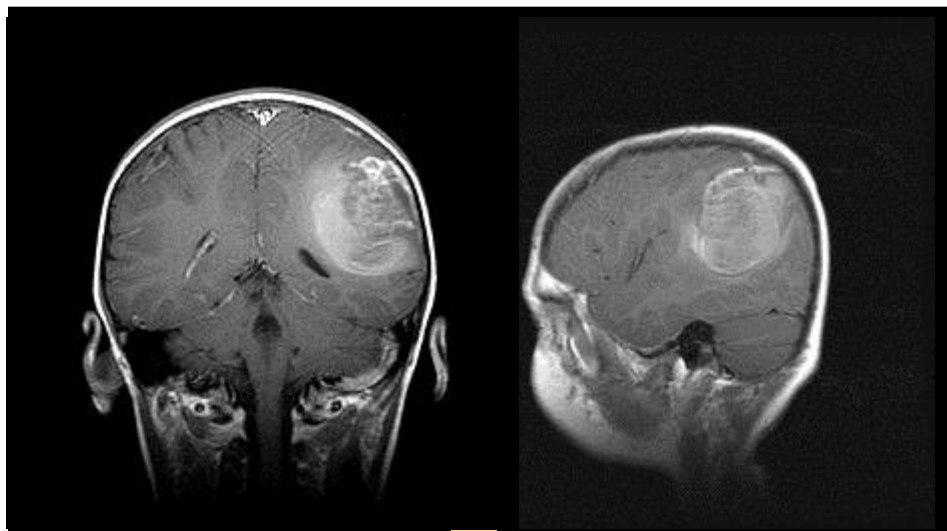

Salvage

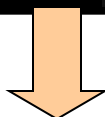

Regimen

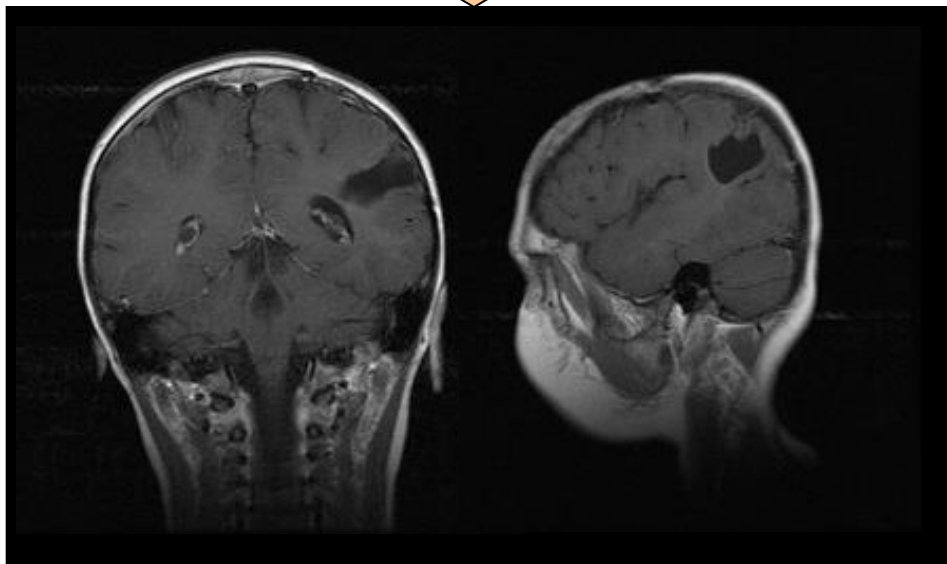

PFS at 5 yrs

# Recurrent neuroblastoma metastatic to the CNS

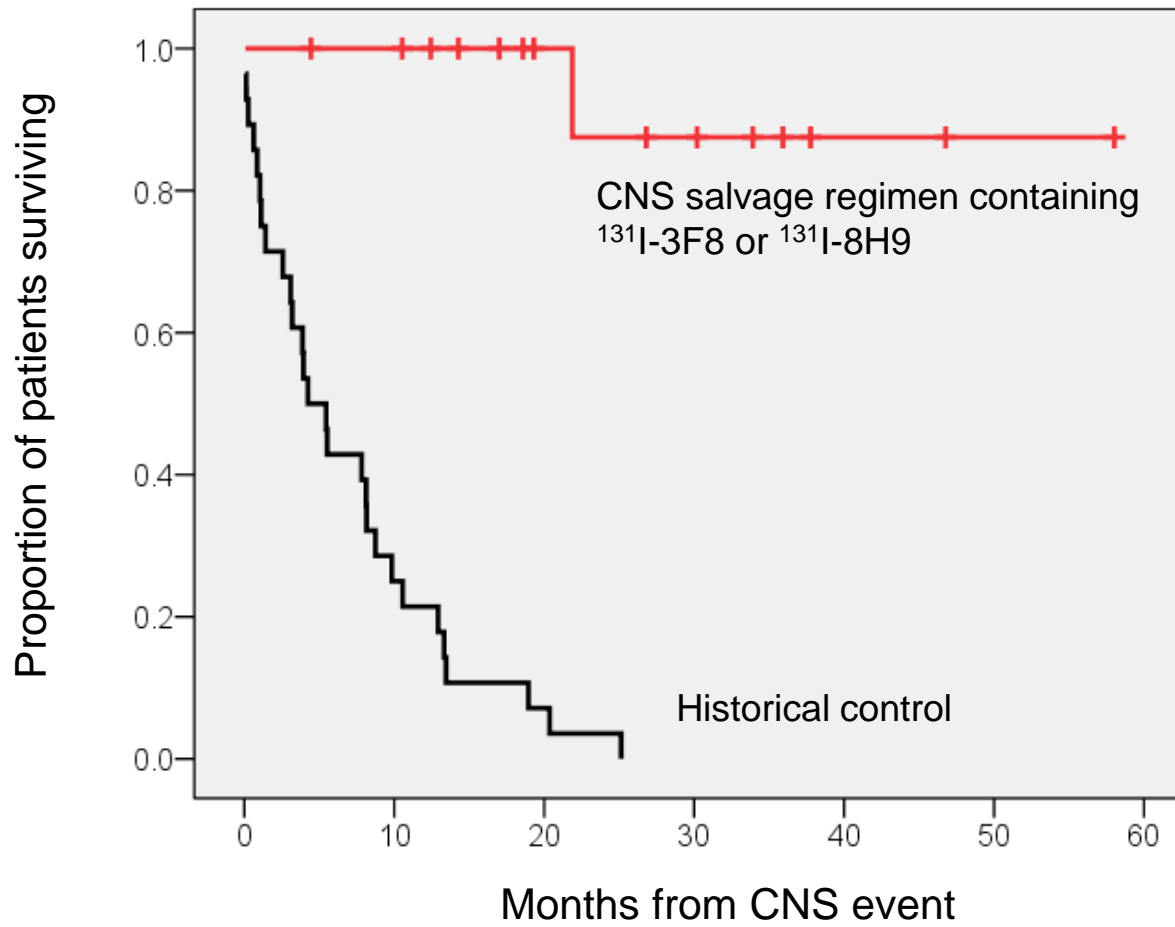

Supplementary Figure S3A

# 124I-A33 in colorectal Ca

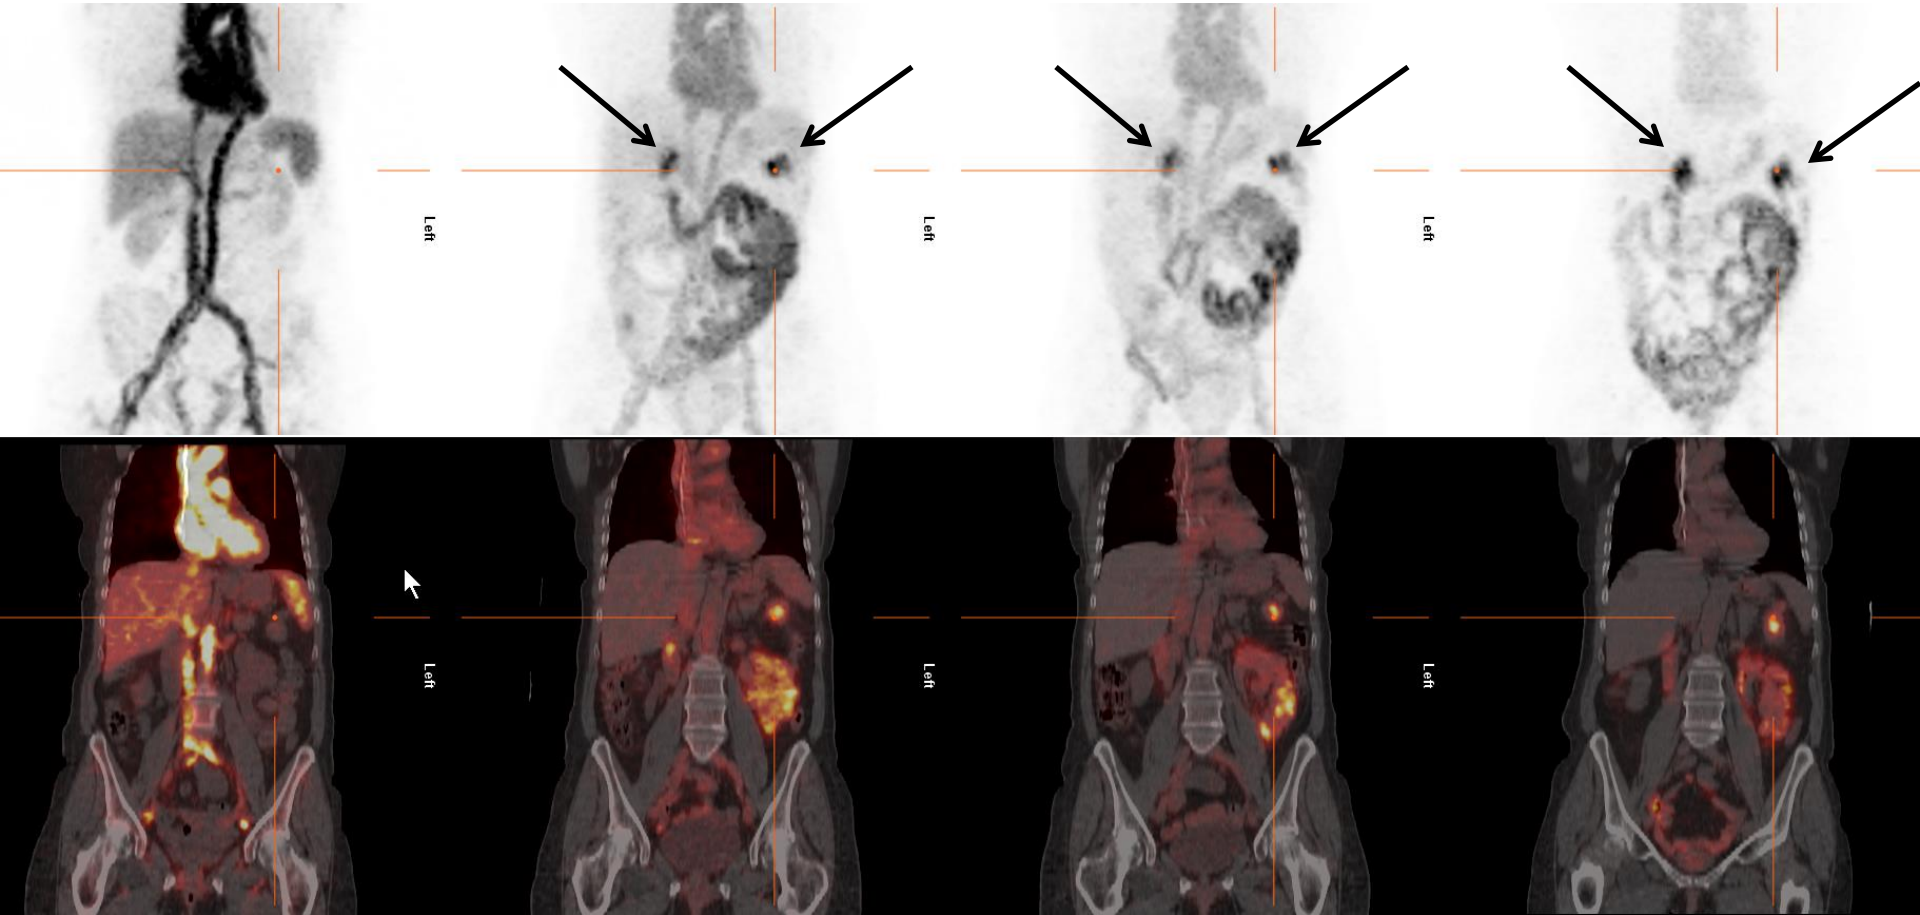

# Histologic Examination of Tumor

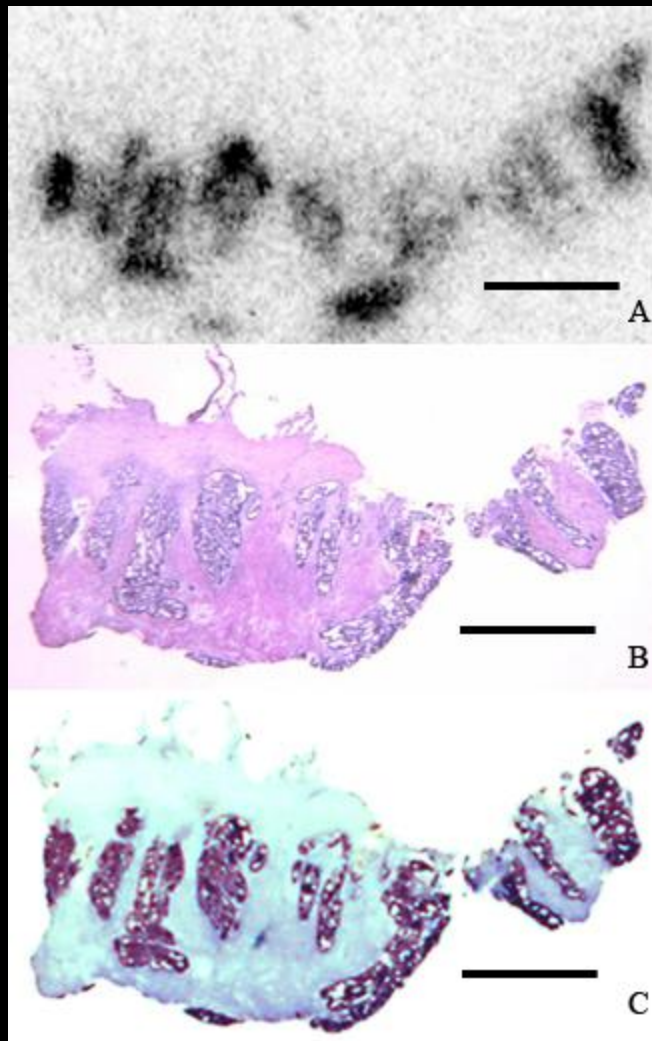

Quantitative  
Autoradiography (QAR)\*

\*viable tumor (0.051%ID/g) >  
section average (0.017%ID/g)  
factor of 3.

Hematoxylin and Eosin

A33 Immunohistology

*\*Previously published in O'Donoghue, J.A. et al. 124I-huA33 antibody uptake is driven by A33 antigen concentration in tissues from colorectal cancer patients imaged by immuno-PET. J Nucl Med 52, 1878-85 (2011).*

# [A33] vs Uptake in Tumor

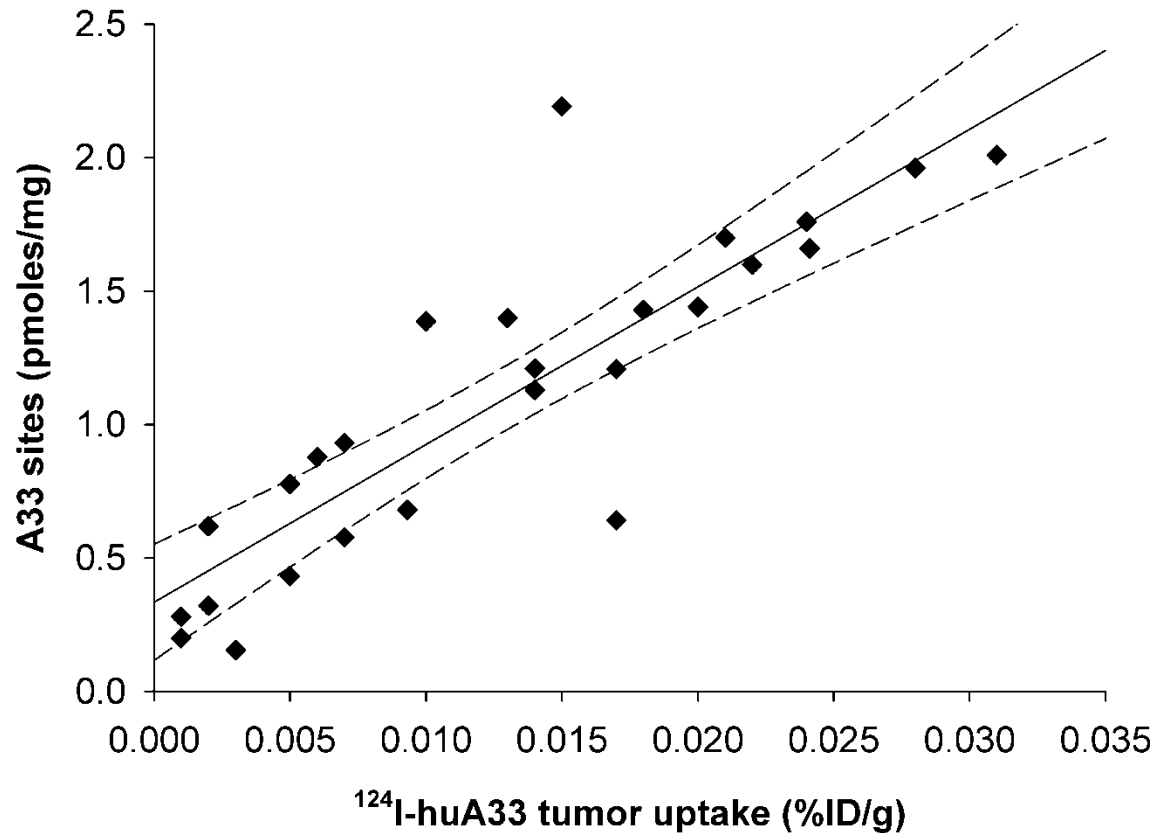

\*Modified from a figure published in O'Donoghue, J.A. et al.  $^{124}\text{I}$ -huA33 antibody uptake is driven by A33 antigen concentration in tissues from colorectal cancer patients imaged by immuno-PET. *J Nucl Med* **52**, 1878-85 (2011).
